# Supplementary material for: High-precision measurement of Ag isotopes for silicate rocks by MC-ICP-MS
Source: Royal Society of Chemistry journal article supplement (doi:10.1039/d3ja00424d), 2024-01-01
Supplement: d3ja00424d1.pdf [file d3ja00424d1.pdf]

**Table S1. Contents of matrix / Ag ratios of BCR-2 and AGV-2 after four-step chromatography process**

| Matrix / Ag ratio | BCR-2 | AGV-2 |
|-------------------|-------|-------|
| Ti:Ag             | 0.12  | 0.04  |
| Fe:Ag             | 0.29  | 0.07  |
| Cu:Ag             | 0.18  | 0.30  |
| Zn:Ag             | 0.00  | 0.04  |
| Ge:Ag             | 0.00  | 0.04  |
| Rb:Ag             | 0.44  | 0.00  |
| Nb:Ag             | 0.02  | 0.01  |
| Zr:Ag             | 0.00  | 0.00  |
| Cd:Ag             | 0.00  | 0.00  |

**Table S2. Synthetic solutions with different matrix element ratios and Ag isotope compositions**

| Synthetic |                 |                 |                 |     |                |                 |    |    |                 |                 |                 |    |    |    |    |    |    |    |     |                 |     |    |                         |      |    |
|-----------|-----------------|-----------------|-----------------|-----|----------------|-----------------|----|----|-----------------|-----------------|-----------------|----|----|----|----|----|----|----|-----|-----------------|-----|----|-------------------------|------|----|
| solution  | Na <sup>+</sup> | Mg <sup>+</sup> | Al <sup>+</sup> | S   | K <sup>+</sup> | Ca <sup>+</sup> | Ti | Mn | Fe <sup>+</sup> | Cu <sup>+</sup> | Zn <sup>+</sup> | Ga | As | Se | Sr | Y  | Zr | Nb | Mo  | Ag <sup>a</sup> | Cd  | Sn | $\delta^{109}\text{Ag}$ | 2SD  | N  |
| I         | -               | 2               | -               | -   | -              | -               | 20 | -  | 2               | 1               | 1               | -  | 20 | -  | 20 | 20 | 10 | 10 | 20  | 1               | 30  | 10 | 0.02                    | 0.05 | 6  |
| II        | 1.0             | 1.5             | 4.0             | 20  | 1.5            | 12              | 5  | 10 | 14              | 5.0             | 5.0             | 10 | 20 | 20 | 10 | 10 | -  | -  | 100 | 2               | 200 | 15 | 0.03                    | 0.04 | 12 |
| III       | 1.0             | 1.5             | 4.0             | 5.0 | 1.5            | 12              | 2  | 2  | 14              | 0.5             | 0.1             | 10 | 10 | 20 | 10 | 10 | -  | -  | 50  | 0.5             | 200 | 15 | 0.03                    | 0.04 | 12 |

\* The unit of major elements is wt.%. The unit of trace elements is  $\mu\text{g/g}$ . <sup>a</sup> The reference material SRM978a.

2SD is the 2 standard deviation for the synthetic solution ( $n \geq 3$ ). N is the number of repeated measurements.

**Table S3. Ag isotope compositions of the doping solutions analyzed by MC-ICP-MS**

| Molar element ratio | $\delta^{109}\text{Ag}_{\text{SRM978a}}$ (‰) | 2SD (n=3) |
|---------------------|----------------------------------------------|-----------|
| Fe:Ag = 1:10        | 0.00                                         | 0.03      |
| Fe:Ag = 1:1         | 0.07                                         | 0.05      |
| Fe:Ag = 5:1         | 0.19                                         | 0.05      |
| Cu:Ag = 1:2         | 0.00                                         | 0.04      |
| Cu:Ag = 1:1         | 0.03                                         | 0.04      |
| Cu:Ag = 2:1         | 0.17                                         | 0.02      |
| Zn:Ag = 1:2         | 0.00                                         | 0.03      |
| Zn:Ag = 1:1         | 0.01                                         | 0.04      |
| Zn:Ag = 2:1         | -0.26                                        | 0.04      |
| Zr:Ag = 1:100       | -0.01                                        | 0.02      |
| Zr:Ag = 1:10        | -0.08                                        | 0.05      |
| Zr:Ag = 1:2         | -0.39                                        | 0.04      |
| Nb:Ag = 1:100       | -0.02                                        | 0.01      |
| Nb:Ag = 2:10        | 0.06                                         | 0.04      |
| Nb:Ag = 1:2         | 0.26                                         | 0.03      |
| Cd:Ag = 1:1         | 0.01                                         | 0.04      |
| Cd:Ag = 5:1         | -0.01                                        | 0.04      |
| Cd:Ag = 10:1        | 0.08                                         | 0.06      |

**Figure S1.** Elution curves of the Ag purification procedure using different rock standards, BCR-2 (a) and AGV-2 (b) with the same separation step as Figure 1. Elution curves of Ag purification with AG50 W-X8 resin as eluted at 1 mol/L (c) and 2 mol/L (d) HNO<sub>3</sub>.

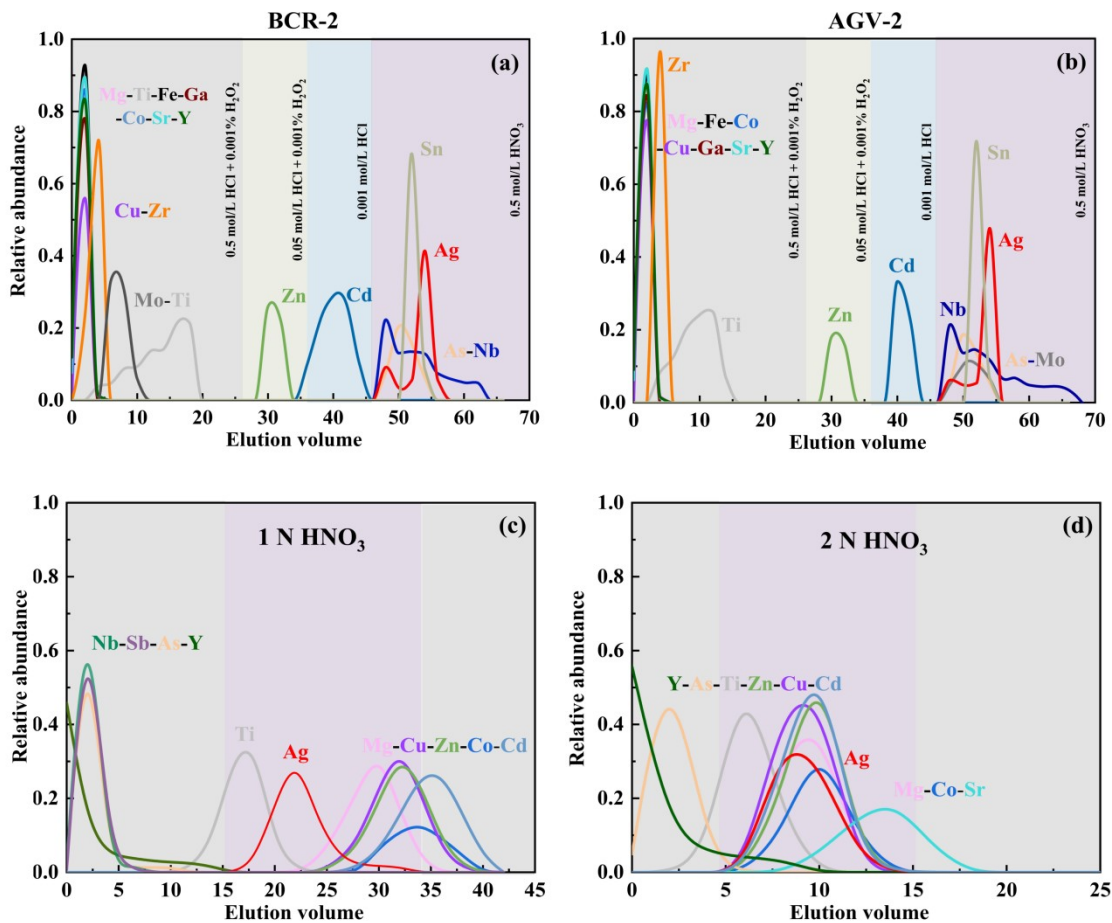

**Figure S2. The effect of Zr and Nb doping on  $\delta^{109}\text{Ag}_{\text{SRM978}}$ .**  $\delta^{109}\text{Ag}_{\text{SRM978}}$  show an extreme drifting even when SRM978a was doped with tiny amounts of Zr and Nb solutions.

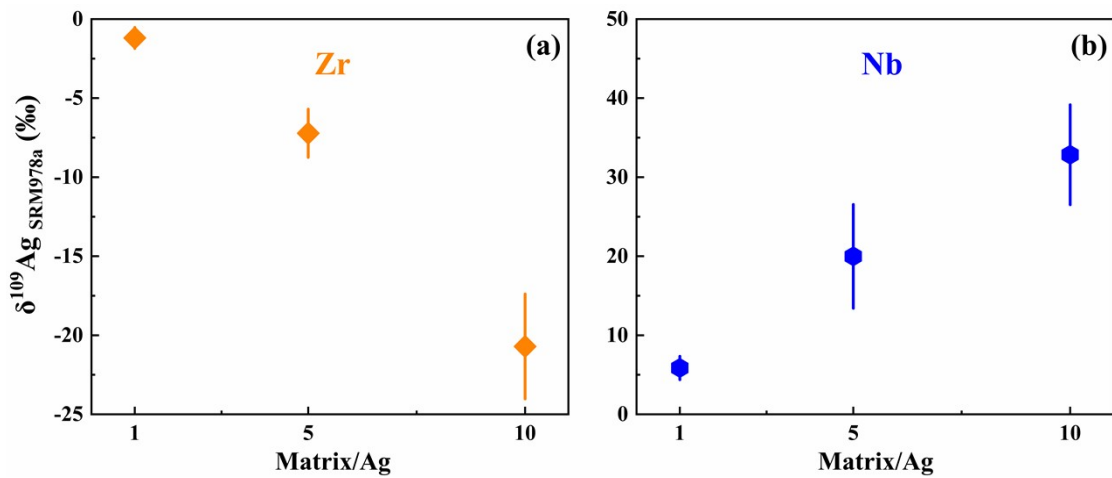

**Figure S3.** The Ag isotope data of the in-house laboratory standards ICP-Ag and USTC-Ag analyzed by MC-ICP-MS over 3 years.

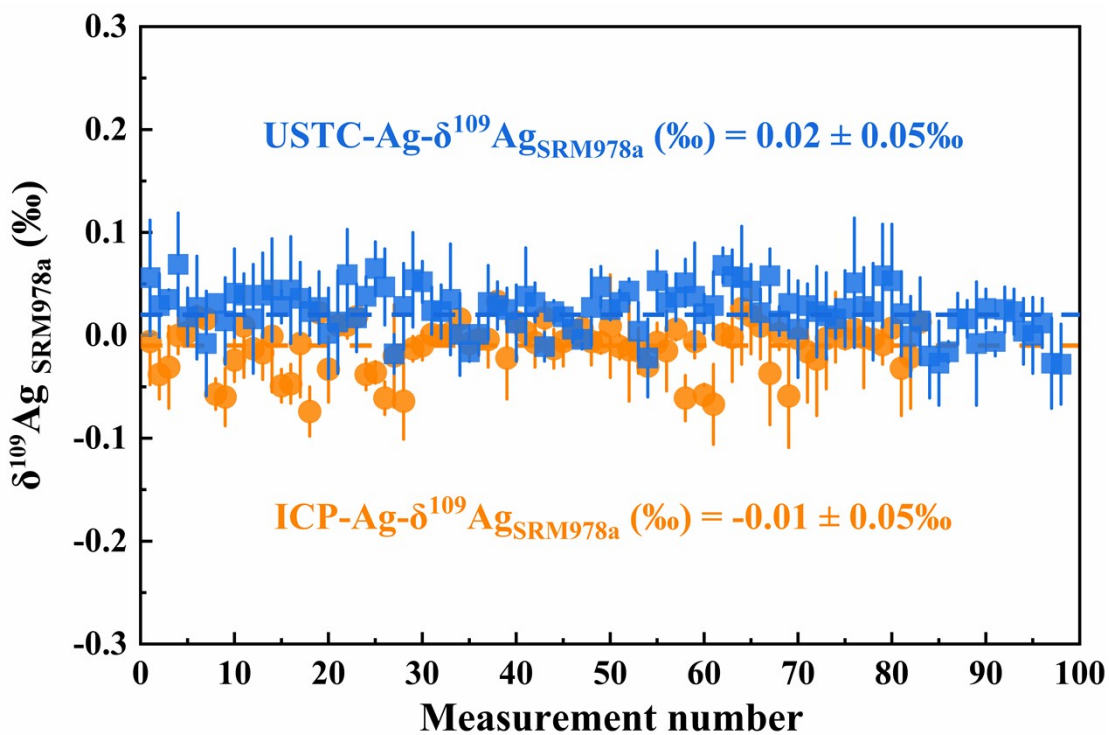

Error bars represent the 2SD uncertainties for each measurement of  $0.05\text{‰}$  ( $n \geq 3$ ). The dashed lines represent the average  $\delta^{109}\text{Ag}_{\text{SRM978a}}$  values of both.
